# Supplementary material for: As good as human experts in detecting plant roots in minirhizotron images but efficient and reproducible: the convolutional neural network “RootDetector”
Source: PubMed Central journal article supplement (PMC9876992; doi:10.1038/s41598-023-28400-x), 2023-01-25

## SUPPLEMENTS

**As good as human experts in detecting plant roots in minirhizotron images but efficient and reproducible: The Convolutional Neural Network “RootDetector”**

Bo Peters<sup>1\*</sup>, Gesche Blume-Werry<sup>1,2</sup>, Alexander Gillert<sup>3</sup>, Sarah Schwieger<sup>1,2</sup>, Uwe Freiherr von Lukas<sup>3,4</sup>, Juergen Kreyling<sup>1</sup>

1: Experimental Plant Ecology, Institute of Botany and Landscape Ecology, University of Greifswald, Soldmannstraße 15, D-19489 Greifswald, Germany

2: Department of Ecology and Environmental Science, Umeå University, Umeå, Sweden

3: Fraunhofer Institute for Computer Graphics Research IGD, Rostock

4: Institute for Visual & Analytic Computing, University of Rostock

Fig. S1: Visual impression of the mesocosm experiment.

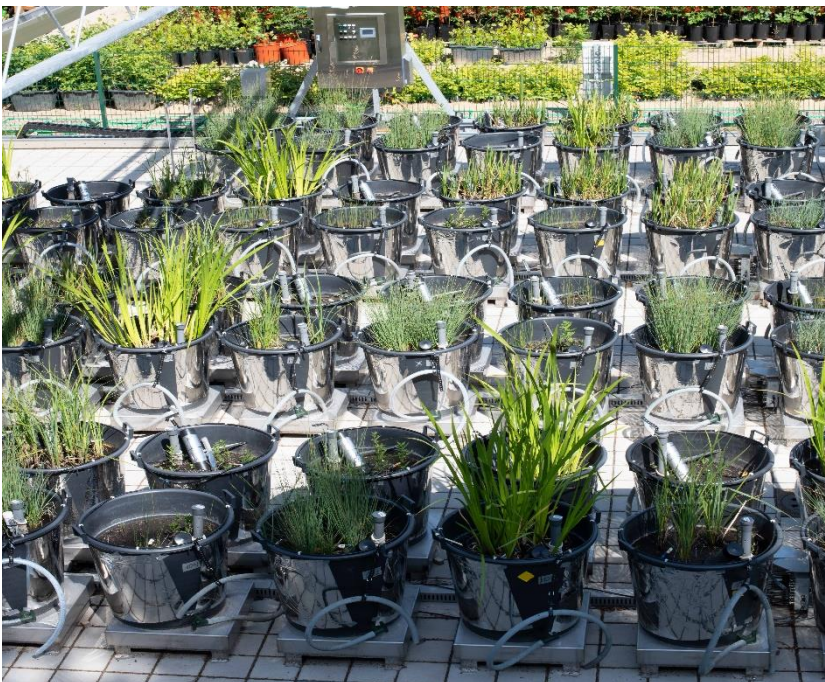

Fig. S2: Visual impressions of the different wetland types covered in the field study, including a) a sedge-dominated percolation fen, b) a coastal flood fen and c) an alder (*Alnus glutinosa*) forest. The minirhizotrons are visible in b) as silver tubes at 45° angles with their aboveground part covered by opaque silver tape preventing the entry of light.

a)

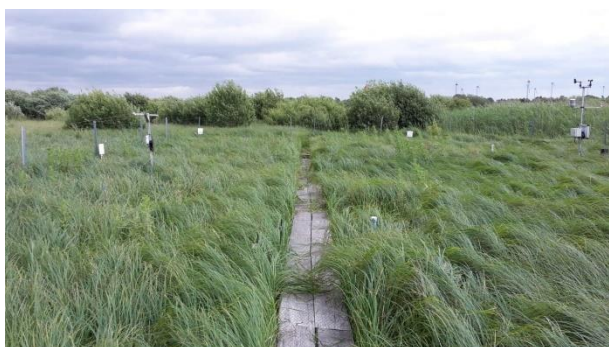

b)

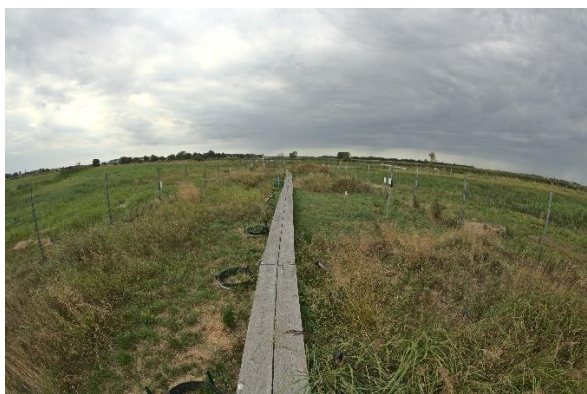

c)

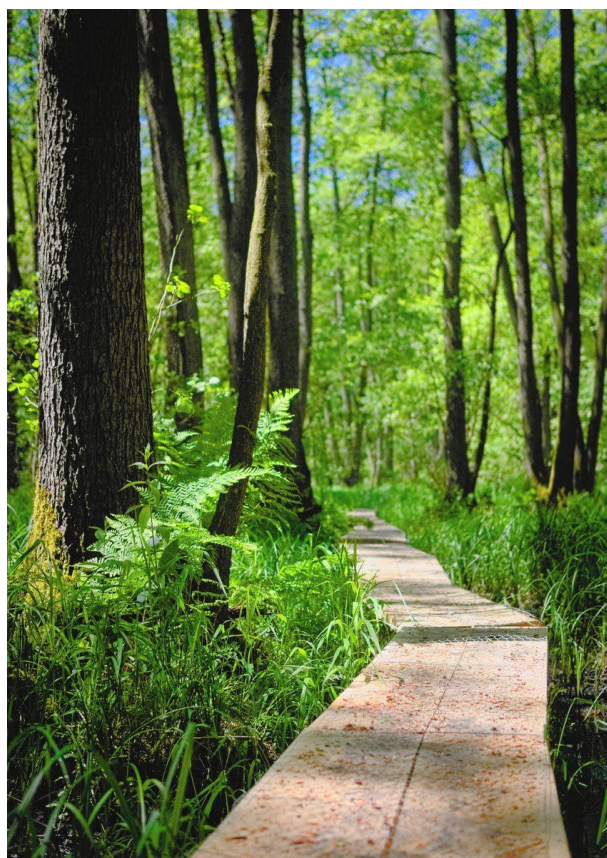

Supplement: 41598_2023_28400_MOESM1_ESM.pdf [file 41598_2023_28400_MOESM1_ESM.pdf]
